# Supplementary material
Source: PubMed Central journal article supplement (PMC7903919)
Supplement: NIHMS1669806-supplement-Suppl__Material_1.pdf [file NIHMS1669806-supplement-Suppl__Material_1.pdf]

**Table, Supplemental Digital Content 1. Model performance for the linear and interactive GBM and logistic regression.**

| <b>Model</b> | <b>Average F1 (SD)</b> | <b>Average Precision (SD)</b> |
|--------------|------------------------|-------------------------------|
| <b>GLM</b>   | 0.577 (0.200)          | 0.696 (0.249)                 |
| <b>GBM</b>   | 0.710 (0.191)          | 0.847 (0.198)                 |

**SDC1.** Classification results demonstrating higher average F1 score, precision, and recall obtained by the linear and interactive GBM models compared to logistic regression (GLM).
