# Supplementary material
Source: PubMed Central journal article supplement (PMC7903919)
Supplement: NIHMS1669806-supplement-Suppl__Material_2.pdf [file NIHMS1669806-supplement-Suppl__Material_2.pdf]

**Figure, Supplement Digital Content 2. Feature importance for the linear logistic regression.**

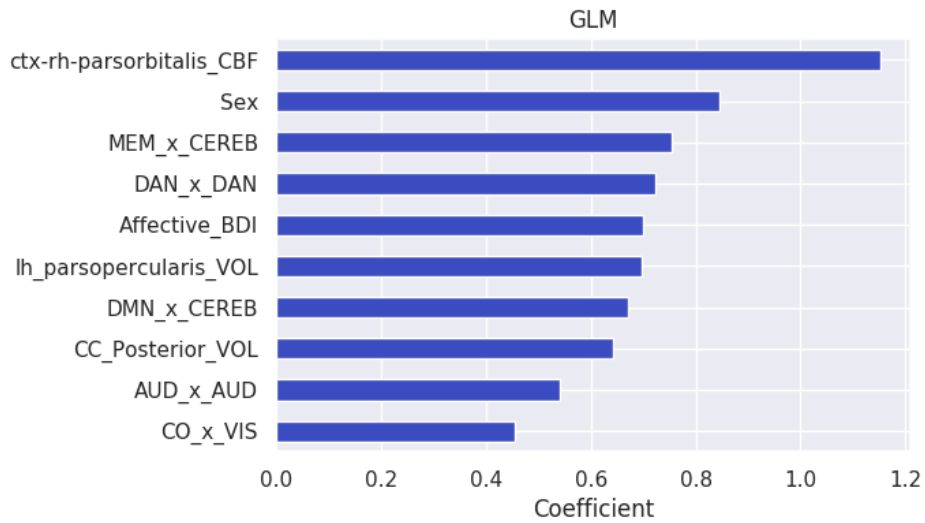

**SDC2.** Feature importance (by rank order). Cerebral blood flow in the left lateral occipital cortex (ctx-lh-lateraloccipital\_CBF); sex; memory\_x\_cerebellum connectivity (MEM\_x\_CEREB); dorsal attention (DAN) intranetwork connectivity; score on the Affective subscale of the Beck Depression Inventory II (Affective\_BDI); left parsopercularis volume (lh\_parsopercularis\_VOL); default mode x cerebellum connectivity (DMN\_x\_CEREB); posterior corpus callosum volume (CC\_Posterior\_Vol); auditory x auditory connectivity (AUD\_x\_AUD); control and visual connectivity (CO\_x\_VIS).
